# Supplementary material
Source: PubMed Central journal article supplement (PMC10131091)
Supplement: NIHMS1888436-supplement-1.pdf [file NIHMS1888436-supplement-1.pdf]

Figure S1

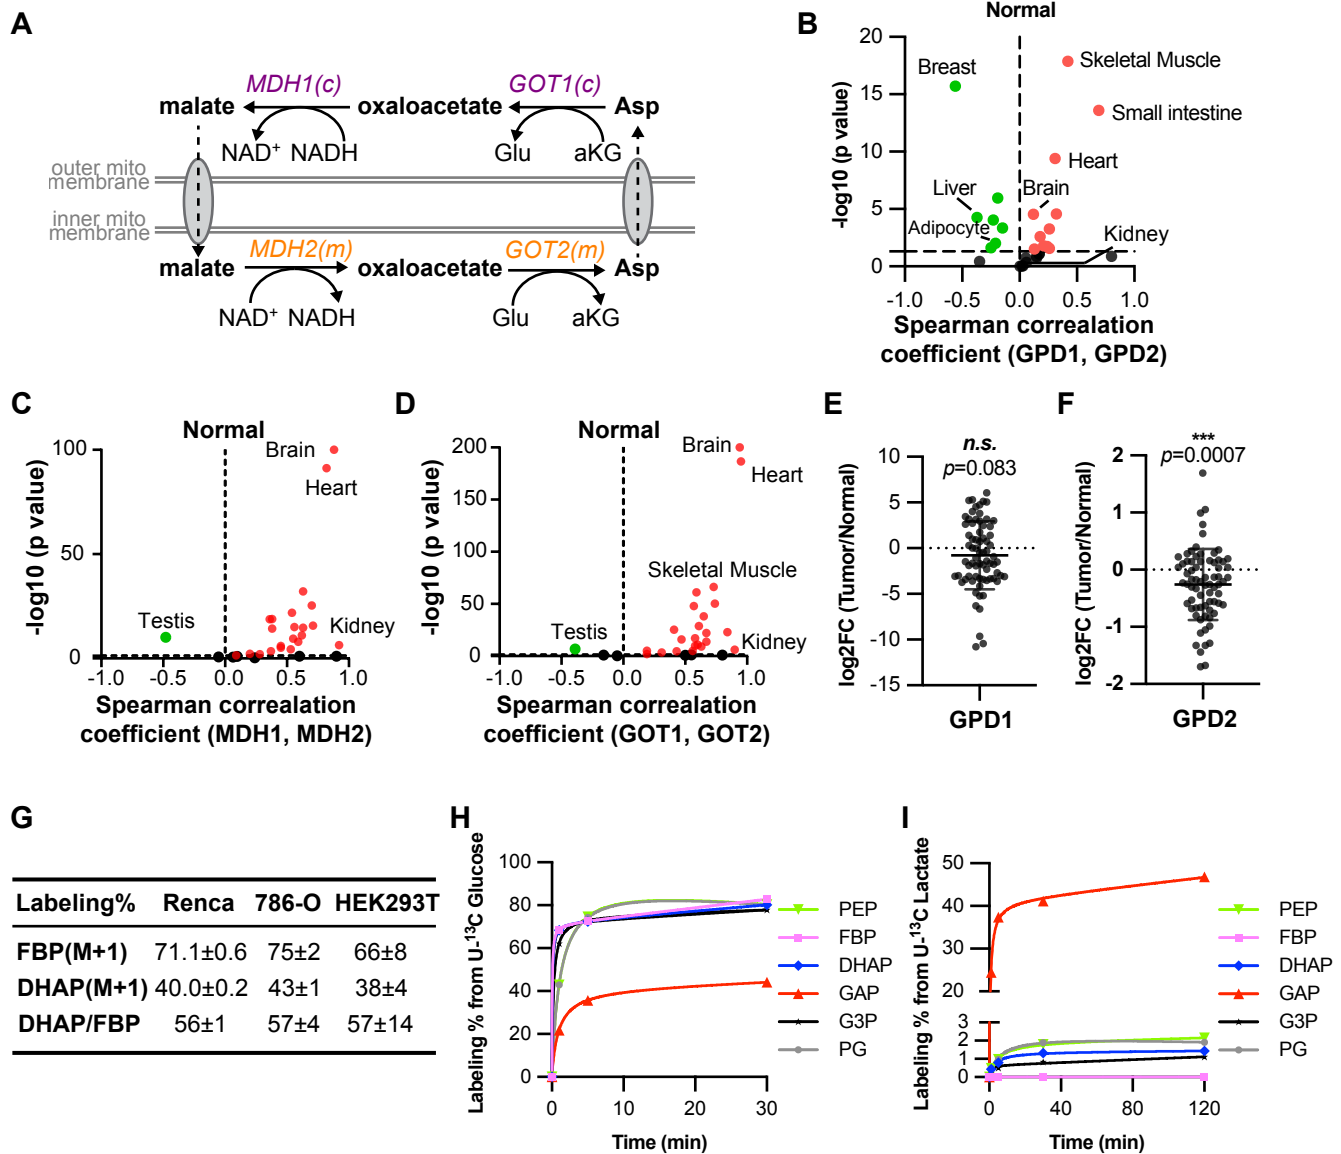

**Figure S1 (Related to Figure 1). Correlation analysis and metabolic flux analysis of G3PS and MAS**

- (A) Diagram of malate-aspartate shuttle.
- (B) Spearman correlation analysis of GPD1 and GPD2 expression in normal tissues. Red dot represents positive coefficients with p value < 0.05. Green dot represents negative coefficients with p value < 0.05.
- (C) Spearman correlation analysis of MDH1 and MDH2 expression in normal tissues. Red dot represents positive coefficients with p value < 0.05. Green dot represents negative coefficients with p value < 0.05.
- (D) Spearman correlation analysis of GOT1 and GOT2 expression in normal tissues. Red dot represents positive coefficients with p value < 0.05. Green dot represents negative coefficients with p value < 0.05.
- (E)  $\log_2$  fold change of the expression of GPD1 in tumor compared to paired normal tissue in KIRC patients
- (F)  $\log_2$  fold change of the expression of GPD2 in tumor compared to paired normal tissue in KIRC patients
- (G) Labeling percentage of M+1 isotopologue of DHAP after cells were labeled with  $1\text{-}^{13}\text{C}$  glucose for 4hr.
- (H) Labeling kinetics of glycolytic intermediates with  $U\text{-}^{13}\text{C}$  glucose.
- (I) Labeling kinetics of glycolytic intermediates with  $U\text{-}^{13}\text{C}$  lactate.

Figure S2

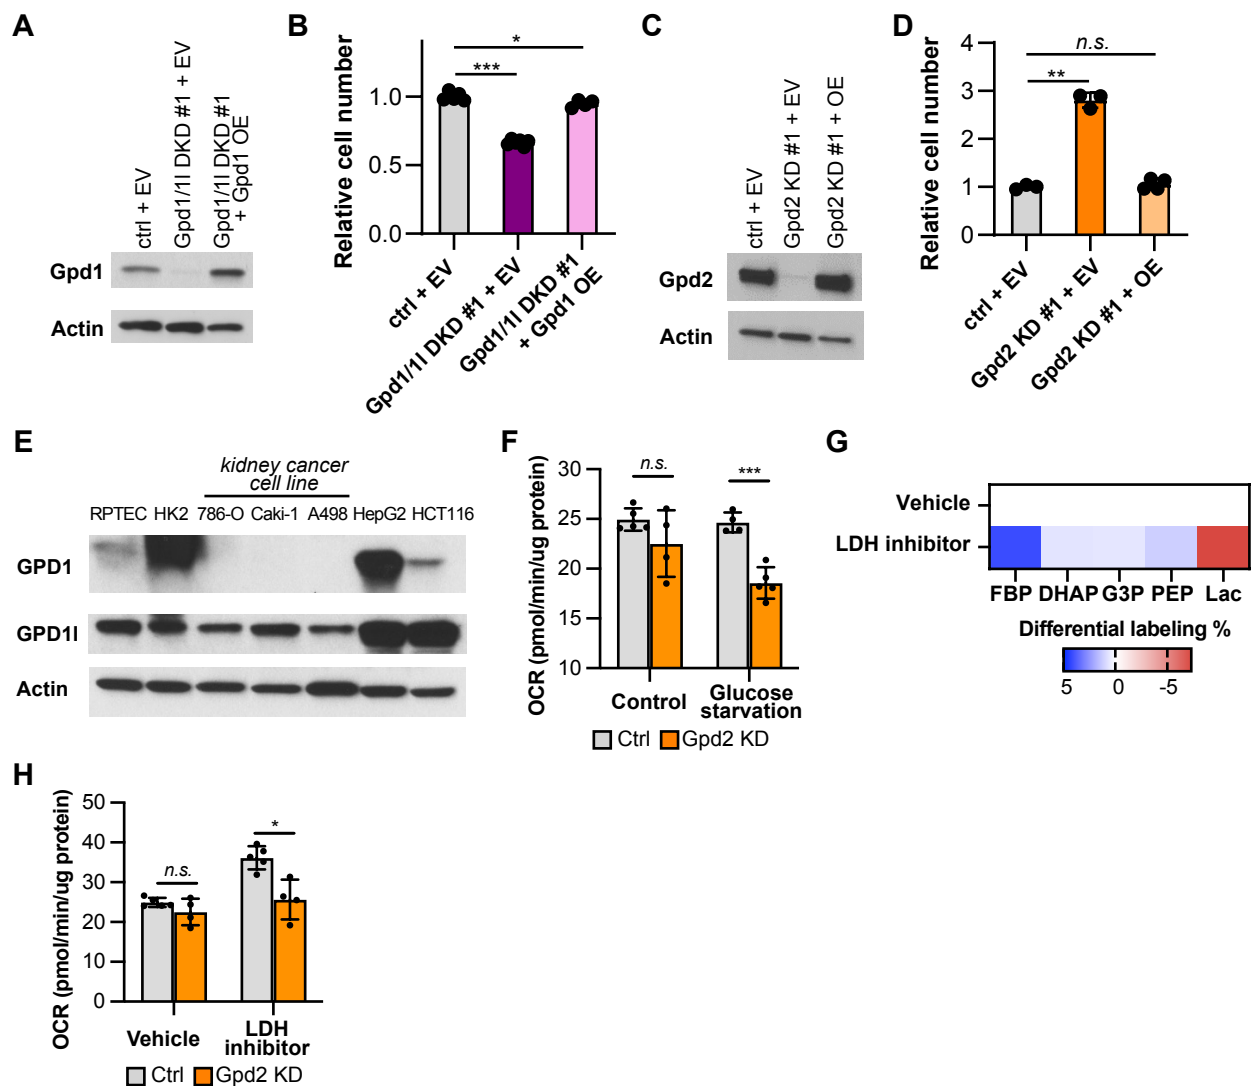

### Figure S2 (Related to Figure 2). Protein expression and metabolic phenotypes of Gpd KD cells

- (A) Western blot analysis of Gpd1 in control cells expressing empty vector (ctrl+EV), Gpd1/1I DKD cells expressing empty vector (Gpd1/1I DKD #1+EV), and Gpd1/1I DKD cells expressing shRNA-resistant Gpd1 (Gpd1/1I DKD #1+Gpd1 OE).  $\beta$ -actin was used as a loading control.
- (B) Proliferation rate of ctrl+EV, Gpd1/1I DKD+EV, and Gpd1/1I DKD+Gpd1OE.
- (C) Western blot analysis of Gpd2 in control cells expressing empty vector (ctrl+EV), Gpd2 KD cells expressing empty vector (Gpd2 KD#1+EV), and Gpd2 KD cells expressing shRNA-resistant Gpd2 (Gpd2 KD#1+Gpd2 OE).  $\beta$ -actin was used as a loading control.
- (D) Proliferation rate of ctrl+EV, Gpd2 KD+EV, and Gpd2 KD+Gpd2OE.
- (E) Western blot analysis of Gpd1 in non-transformed kidney cell lines (Primary Renal Proximal Tubule Epithelial Cells RPTEC and HK2), kidney cancer cell lines (786-O, Caki-1 and A498), liver cancer cell line HepG2 and colorectal cancer cell line HCT116.
- (F) Oxygen consumption rate of control and Gpd2 KD cells cultured in the presence of 5mM glucose (Control) or 1mM glucose (glucose starvation) for 24hr.
- (G) Differential labeling percentages in glycolytic metabolites after cells were labeled with U-<sup>13</sup>C lactate in the presence of vehicle control or LDH inhibitor (GSK2837808A).
- (H) Oxygen consumption rate of control and Gpd2 KD cells treated with vehicle control or 10 $\mu$ M LDH inhibitor (GSK2837808A) for 24hr.
- Data are presented as mean  $\pm$  SEM. \* $p$ <0.05, \*\* $p$ <0.01, \*\*\* $p$ <0.001, n.s. not statistically significant.

Figure S3

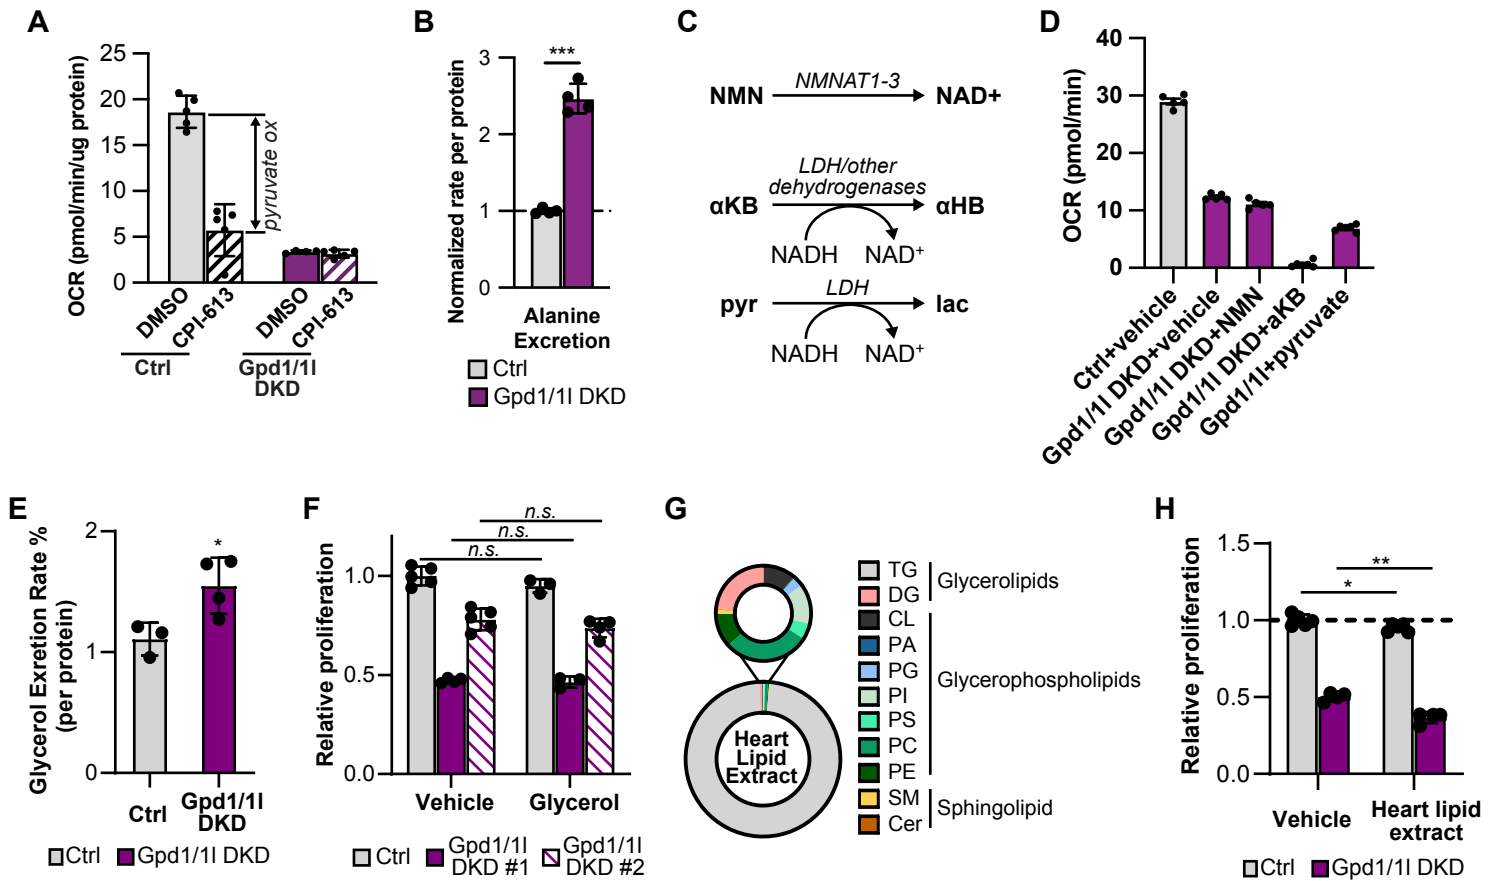

**Figure S3 (Related to Figure 3). Rescue experiments in Gpd1/1l DKD renca cells**

- (A) Oxygen consumption rate of ctrl and Gpd1/1l DKD cells treated with vehicle (DMSO) or CPI-613.
- (B) Relative alanine excretion rate in ctrl and Gpd1/1l DKD cells.
- (C) Reactions that produce NAD+. NMN, nicotinamide mononucleotide. αKB, alpha-ketobutyrate. αHB, alpha-hydroxybutyrate. Pyr, pyruvate. Lac, lactate.
- (D) Oxygen consumption rate of ctrl and Gpd1/1l DKD cells treated with vehicle, NMN, aKB or pyruvate.
- (E) Glycerol secretion rate of ctrl and Gpd1/1l DKD cells.
- (F) The relative proliferation of ctrl and Gpd1/1l DKD cells supplemented with water (vehicle) or 1mM glycerol.
- (G) Lipid composition in mouse heart lipid extract.
- (H) The relative proliferation of ctrl and Gpd1/1l DKD cells supplemented with ethanol (vehicle) or heart lipid extract.

Data are presented as mean ±SEM. \*p<0.05, \*\*p<0.01, \*\*\*p<0.001, n.s. not statistically significant.

Figure S4

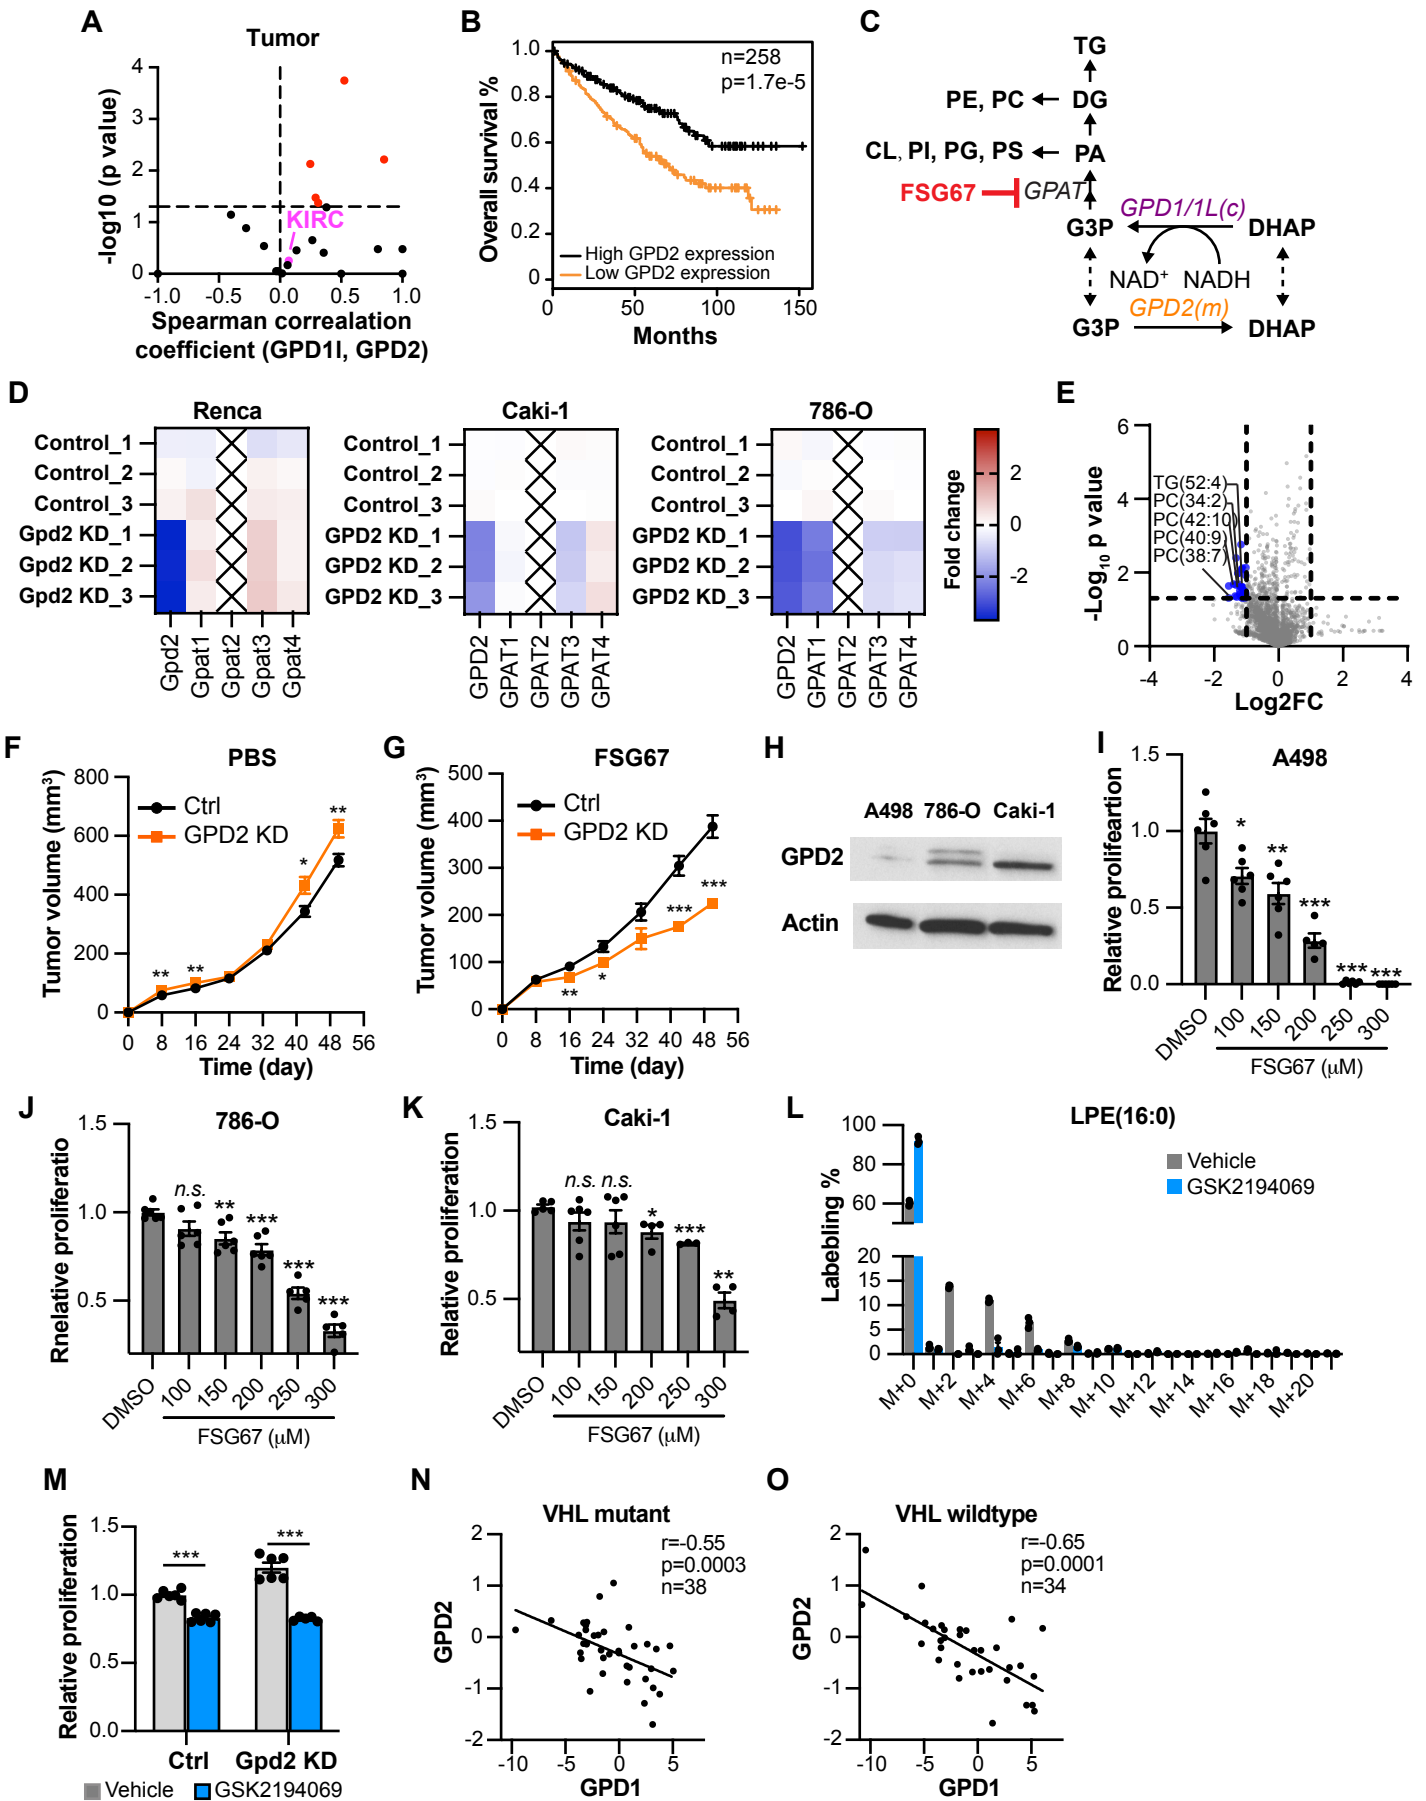

**Figure S4 (Related to Figure 4). Gpd2 inhibition promotes lipid synthesis and correlates with worse overall survival in patients**

- (A) Spearman correlation analysis of GPD1I and GPD2 expression in normal tissue. Red dot represents positive coefficients with  $p$  value  $< 0.05$ .
- (B) Overall survival of KIRC patients with high and low expression of GPD2.
- (C) Diagram showing effect of FSG67 inhibition on Gpat which connects glycerol-3-phosphate shuttle and lipid synthesis.
- (D)  $\log_2$  fold change in the expression levels of GPATs in control and GPD2 KD cells.
- (E) Volcano plot showing the  $\log_2$  fold change and  $-\log_{10}$   $p$  value of the lipidome in plasma from animlas treated with FSG67 compared to PBS control. Blue dots represent metabolic features that had fold change  $< 0.5$  and  $p$  value  $< 0.05$ .
- (F) Tumor growth curve of ctrl and GPD2 KD 786-O xenograft in SCID mice treated with PBS.
- (G) Tumor growth curve of ctrl and GPD2 KD 786-O xenograft in SCID mice treated with FSG67.
- (H) Western blot analysis of GPD2 in kidney cancer cell lines.
- (I) Relative proliferation of A498 cells upon increasing dose of FSG67 treatments.
- (J) Relative proliferation of 786-O cells upon increasing dose of FSG67 treatments.
- (K) Relative proliferation of Caki-1 cells upon increasing dose of FSG67 treatments.
- (L) Isotopologue distribution pattern of lysophosphatidylethanolamine (LPE(16:0)) in cells labeled with  $U\text{-}^{13}\text{C}$  acetate for 24hr in the presence of vehicle control or 75nM GSK2194069.
- (M) Relative proliferation of ctrl and Gpd2 KD Renca cells treated wth vehicle or GSK2194069.
- (N) Spearman correlation analysis showing negative correlation between the expression of GPD1 and GPD2 in KIRC patients with mutant VHL.
- (O) Spearman correlation analysis showing negative correlation between the expression of GPD1 and GPD2 in KIRC patients with wildtype VHL.

Data are presented as mean  $\pm$ SEM. \* $p < 0.05$ , \*\* $p < 0.01$ , \*\*\* $p < 0.001$ , n.s. not statistically significant.

Table S1 (Related to Figure 1). Labeling percentages of F6P and FBP when cells were labeled with U-<sup>13</sup>C glutamine, U-<sup>13</sup>C lactate or U-<sup>13</sup>C glycerol until isotopic steady state.

| Labeling %     | U- <sup>13</sup> C Glutamine |           | U- <sup>13</sup> C Lactate |         | U- <sup>13</sup> C Glycerol |     |
|----------------|------------------------------|-----------|----------------------------|---------|-----------------------------|-----|
|                | F6P                          | FBP       | F6P                        | FBP     | F6P                         | FBP |
| <b>Renca</b>   | 0±0                          | 0.47±0.06 | 0±0                        | 0.6±0.1 | 0±0                         | 0±0 |
| <b>786O</b>    | 0±0                          | 0.10±0.05 | 0±0                        | 0.6±0.1 | 0±0                         | 3±2 |
| <b>Caki-1</b>  | 0±0                          | 0.1±0.1   | 0.7±0.3                    | 4.4±0.3 | 0±0                         | 2±2 |
| <b>HEK293T</b> | 0±0                          | 0±0       | 0±0                        | 0±0     | 0±0                         | 1±1 |

Table S3 (Related to Figure 3). Lipidomic quantitation of mouse heart and kidney extract

| Lipid Specie | % in Heart Extract | % in Kidney Extract |
|--------------|--------------------|---------------------|
| CL(64:0) IS  | -                  | -                   |
| CL(72:7)     | 1.05E-01           | 4.39E-01            |
| CL(72:8)     | 1.64E-01           | 4.08E-01            |
| PA(24:0) IS  | -                  | -                   |
| PA(32:0)     | 0.00E+00           | 4.13E-03            |
| PA(34:1)     | 5.81E-03           | 9.87E-03            |
| PA(34:2)     | 2.13E-03           | 1.19E-02            |
| PA(36:1)     | 0.00E+00           | 4.28E-03            |
| PA(36:2)     | 0.00E+00           | 1.39E-02            |
| PA(36:4)     | 0.00E+00           | 6.13E-03            |
| PA(38:4)     | 0.00E+00           | 1.32E-02            |
| PA(38:4)     | 0.00E+00           | 1.58E-02            |
| PE(31:1) IS  | -                  | -                   |
| PG(30:0) IS  | -                  | -                   |
| PG(32:0)     | 1.30E-03           | 6.55E-02            |
| PG(34:0)     | 6.23E-03           | 1.38E-02            |
| PG(34:1)     | 3.19E-02           | 3.54E-01            |
| PG(34:2)     | 8.58E-03           | 6.73E-02            |
| PG(36:0)     | 5.66E-04           | 1.68E-03            |
| PG(36:1)     | 7.37E-03           | 2.19E-02            |
| PG(36:2)     | 8.70E-03           | 1.13E-01            |
| PG(36:3)     | 4.50E-03           | 3.85E-02            |
| PG(36:4)     | 6.35E-03           | 1.34E-02            |
| PG(38:4)     | 5.36E-03           | 9.73E-03            |
| PG(38:5)     | 2.45E-03           | 1.76E-02            |
| PG(38:6)     | 1.51E-04           | 2.41E-02            |
| PG(40:8)     | 0.00E+00           | 4.61E-02            |
| PI(32:0)     | 1.77E-04           | 9.45E-03            |
| PI(34:1)     | 9.86E-03           | 4.03E-02            |
| PI(34:2)     | 6.02E-03           | 1.85E-02            |
| PI(36:2)     | 1.19E-01           | 5.91E-02            |
| PI(36:3)     | 1.67E-02           | 1.99E-02            |
| PI(36:4)     | 3.99E-03           | 4.19E-02            |
| PI(38:4)     | 1.54E-01           | 3.60E-01            |
| PI(38:5)     | 1.97E-02           | 3.38E-02            |
| PI(38:6)     | 1.41E-03           | 6.04E-02            |
| PS(28:0) IS  | -                  | -                   |
| PS(32:0)     | 5.85E-04           | 2.60E-03            |
| PS(34:0)     | 1.96E-03           | 3.37E-03            |
| PS(34:1)     | 3.17E-03           | 7.40E-03            |
| PS(34:2)     | 4.85E-04           | 6.28E-03            |
| PS(36:1)     | 4.62E-02           | 2.88E-02            |
| PS(36:2)     | 5.11E-02           | 3.81E-02            |
| PS(36:3)     | 2.83E-03           | 5.27E-03            |

|                 |          |          |
|-----------------|----------|----------|
| PS(36:4)        | 6.40E-05 | 3.57E-02 |
| PS(38:4)        | 1.39E-02 | 2.06E-01 |
| PS(38:5)        | 1.14E-02 | 3.48E-02 |
| PS(38:6)        | 0.00E+00 | 2.25E-02 |
| PS(40:8)        | 0.00E+00 | 3.38E-03 |
| Cer(d34:1)      | 1.99E-03 | 8.56E-02 |
| Cer(d35:1) IS   | -        | -        |
| Cer(d36:1)      | 2.68E-03 | 4.96E-03 |
| Cer(d36:2)      | 0.00E+00 | 2.56E-03 |
| DG(24:0) NH4 IS | -        | -        |
| DG(32:0) NH4    | 2.58E-02 | 1.80E-01 |
| DG(34:0) NH4    | 6.95E-02 | 1.21E-01 |
| DG(34:1) NH4    | 1.07E-01 | 5.73E-01 |
| DG(36:0) NH4    | 9.25E-03 | 0.00E+00 |
| DG(36:3) NH4    | 2.25E-01 | 1.70E+00 |
| DG(36:4) NH4    | 2.20E-02 | 1.03E+00 |
| DG(38:4) NH4    | 3.03E-02 | 6.91E-01 |
| DG(38:5) NH4    | 6.62E-03 | 2.63E-01 |
| DG(38:6) NH4    | 0.00E+00 | 9.67E-01 |
| DG(40:8) NH4    | 0.00E+00 | 2.27E-01 |
| PC(31:1) IS     | -        | -        |
| PC(32:0)        | 1.77E-02 | 1.54E+00 |
| PC(34:0)        | 7.59E-03 | 1.84E-01 |
| PC(34:1)        | 7.53E-02 | 1.04E+00 |
| PC(34:2)        | 3.58E-01 | 2.07E+00 |
| PC(36:0)        | 4.90E-04 | 1.08E-02 |
| PC(36:1)        | 2.04E-02 | 3.17E-01 |
| PC(36:2)        | 5.25E-02 | 9.03E-01 |
| PC(36:3)        | 2.77E-02 | 6.28E-01 |
| PC(36:4)        | 2.58E-02 | 9.47E-01 |
| PC(38:4)        | 7.26E-03 | 6.68E-01 |
| PC(38:5)        | 7.59E-03 | 4.28E-01 |
| PC(38:6)        | 1.36E-02 | 2.83E+00 |
| PC(40:8)        | 1.41E-03 | 3.36E-01 |
| PE(31:1) IS     | -        | -        |
| PE(32:0)        | 1.51E-04 | 3.84E-03 |
| PE(34:0)        | 4.31E-04 | 2.01E-03 |
| PE(34:1)        | 1.34E-03 | 1.62E-02 |
| PE(34:2)        | 4.46E-03 | 5.90E-02 |
| PE(36:0)        | 3.95E-03 | 2.80E-02 |
| PE(36:1)        | 4.22E-03 | 1.67E-02 |
| PE(36:2)        | 5.08E-02 | 8.99E-02 |
| PE(36:3)        | 7.22E-03 | 6.68E-02 |
| PE(36:4)        | 2.91E-03 | 2.95E-01 |
| PE(38:4)        | 1.46E-01 | 7.71E-01 |
| PE(38:5)        | 1.29E-02 | 1.92E-01 |
| PE(38:6)        | 4.85E-03 | 2.89E-01 |

---

|                 |          |          |
|-----------------|----------|----------|
| PE(40:8)        | 4.84E-03 | 7.54E-02 |
| SM(d34:1)       | 2.56E-02 | 2.28E+00 |
| SM(d35:1) IS    | -        | -        |
| SM(d36:1)       | 5.61E-03 | 1.60E-02 |
| TG(48:0) NH4    | 8.43E-01 | 2.72E-01 |
| TG(50:1) NH4    | 9.65E+00 | 2.23E+00 |
| TG(50:2) NH4    | 8.00E+00 | 4.79E+00 |
| TG(52:0) NH4    | 3.86E-01 | 5.66E-02 |
| TG(52:1) NH4    | 1.23E+01 | 1.11E+00 |
| TG(52:2) NH4    | 2.49E+01 | 6.44E+00 |
| TG(52:3) NH4    | 9.33E+00 | 1.21E+01 |
| TG(52:4) NH4    | 1.46E+00 | 1.03E+01 |
| TG(54:0) NH4    | 1.09E-01 | 1.38E-02 |
| TG(54:1) NH4    | 6.00E+00 | 1.81E-01 |
| TG(54:2) NH4    | 1.56E+01 | 1.91E+00 |
| TG(54:3) NH4    | 7.07E+00 | 6.56E+00 |
| TG(54:4) NH4    | 1.43E+00 | 1.01E+01 |
| TG(54:5) NH4    | 2.87E-01 | 8.96E+00 |
| TG(54:6) NH4    | 6.64E-02 | 4.82E+00 |
| TG(56:4) NH4    | 1.84E-01 | 1.51E+00 |
| TG(56:5) NH4    | 1.25E-01 | 1.05E+00 |
| TG(56:7) NH4    | 5.88E-02 | 7.53E-01 |
| TG(56:7) NH4    | 1.56E-02 | 4.79E-01 |
| TG(56:8) NH4    | 3.60E-03 | 7.36E-01 |
| TG(57:0) NH4 IS | -        | -        |
| TG(58:10) NH4   | 0.00E+00 | 1.67E-01 |
| TG(58:8) NH4    | 0.00E+00 | 3.78E-01 |
| TG(58:9) NH4    | 1.71E-03 | 3.06E-01 |
| TG(60:12) NH4   | 0.00E+00 | 8.49E-02 |

---



Table S4 (Related to Figure 1). Isotopologue distribution pattern of GAP and metabolites involved in metabolic flux analysis

| <b>GAP labeling %</b>  | <b>M+0</b> | <b>M+1</b> | <b>M+2</b> | <b>M+3</b> |
|------------------------|------------|------------|------------|------------|
| 786O_1                 | 53.07      | 0.25       | 1.28       | 45.4       |
| 786O_2                 | 51.95      | 0.33       | 1.66       | 46.05      |
| 786O_3                 | 51.54      | 0.2        | 1.93       | 46.33      |
| Gpd11LDKD_1            | 46.41      | 0.47       | 2.71       | 50.41      |
| Gpd11LDKD_2            | 45.92      | 0.49       | 2.39       | 51.2       |
| Gpd11LDKD_3            | 44.13      | 0.42       | 2.79       | 52.66      |
| HEK293_1               | 49.67      | 0.51       | 1.09       | 48.74      |
| HEK293_2               | 50.73      | 0.51       | 1.04       | 47.73      |
| HEK293_3               | 51.67      | 0.47       | 1.37       | 46.49      |
| Caki-1_1               | 68.11      | 0.52       | 0          | 31.37      |
| Caki-1_2               | 67.34      | 0.33       | 2.59       | 29.73      |
| Caki-1_3               | 66.42      | 0.21       | 2.23       | 31.14      |
| Renca_1                | 62.17      | 0.49       | 2.79       | 34.55      |
| Renca_2                | 56.77      | 1.24       | 2.88       | 39.12      |
| Renca_3                | 54.61      | 1.31       | 2.67       | 41.41      |
| Gpd2KD_1               | 53.17      | 0.98       | 6.78       | 39.07      |
| Gpd2KD_2               | 50.03      | 0.85       | 6.83       | 42.29      |
| Gpd2KD_3               | 51.76      | 0.82       | 8.27       | 39.15      |
| <b>G3P labeling %</b>  | <b>M+0</b> | <b>M+1</b> | <b>M+2</b> | <b>M+3</b> |
| 786O_1                 | 41.68      | 0.00       | 0.00       | 58.32      |
| 786O_2                 | 40.87      | 0.00       | 0.00       | 59.13      |
| 786O_3                 | 40.35      | 0.00       | 0.00       | 59.65      |
| Gpd11LDKD_1            | 39.55      | 0.00       | 0.00       | 60.45      |
| Gpd11LDKD_2            | 40.22      | 0.00       | 0.00       | 59.78      |
| Gpd11LDKD_3            | 38.62      | 0.00       | 0.00       | 61.38      |
| HEK293_1               | 51.95      | 0.85       | 0.00       | 47.21      |
| HEK293_2               | 54.10      | 0.62       | 0.00       | 45.28      |
| HEK293_3               | 53.03      | 0.74       | 0.00       | 46.25      |
| Caki-1_1               | 48.13      | 0.00       | 0.00       | 51.87      |
| Caki-1_2               | 48.79      | 1.62       | 0.00       | 49.59      |
| Caki-1_3               | 48.08      | 1.76       | 0.00       | 50.16      |
| Renca_1                | 32.92      | 1.58       | 1.44       | 64.06      |
| Renca_2                | 41.82      | 1.82       | 1.53       | 54.84      |
| Renca_3                | 42.20      | 2.77       | 1.14       | 53.89      |
| Gpd2KD_1               | 22.64      | 0.88       | 0.64       | 75.83      |
| Gpd2KD_2               | 23.08      | 0.88       | 0.69       | 75.34      |
| Gpd2KD_3               | 23.85      | 0.96       | 0.82       | 74.37      |
| <b>DHAP labeling %</b> | <b>M+0</b> | <b>M+1</b> | <b>M+2</b> | <b>M+3</b> |
| 786O_1                 | 29.81      | 0.32       | 0.00       | 69.87      |
| 786O_2                 | 29.44      | 0.39       | 0.00       | 70.17      |
| 786O_3                 | 28.29      | 0.26       | 0.00       | 71.45      |
| Gpd11LDKD_1            | 22.53      | 0.79       | 0.00       | 76.68      |
| Gpd11LDKD_2            | 19.86      | 0.69       | 9.28       | 70.17      |
| Gpd11LDKD_3            | 18.94      | 0.67       | 10.09      | 70.30      |
| HEK293_1               | 43.09      | 1.04       | 0.00       | 55.87      |
| HEK293_2               | 52.60      | 2.72       | 0.00       | 44.68      |
| HEK293_3               | 44.53      | 2.67       | 0.00       | 52.80      |
| Caki-1_1               | 37.65      | 1.09       | 0.00       | 61.26      |
| Caki-1_2               | 37.51      | 1.24       | 0.00       | 61.26      |
| Caki-1_3               | 38.01      | 1.02       | 0.00       | 60.97      |
| Renca_1                | 26.90      | 1.35       | 1.62       | 70.13      |
| Renca_2                | 29.98      | 1.19       | 2.44       | 66.39      |
| Renca_3                | 27.48      | 1.12       | 3.16       | 68.24      |
| Gpd2KD_1               | 22.55      | 0.90       | 1.25       | 75.30      |
| Gpd2KD_2               | 20.99      | 0.91       | 1.90       | 76.20      |
| Gpd2KD_3               | 17.87      | 1.13       | 2.24       | 78.76      |

| <b>F6P labeling %</b> | <b>M+0</b> | <b>M+1</b> | <b>M+2</b> | <b>M+3</b> | <b>M+4</b> | <b>M+5</b> | <b>M+6</b> |
|-----------------------|------------|------------|------------|------------|------------|------------|------------|
| 786O_1                | 26.74      | 0          | 0          | 8.1        | 0          | 0          | 65.16      |
| 786O_2                | 26.84      | 0          | 0          | 9.79       | 0          | 0          | 63.37      |
| 786O_3                | 24.25      | 0          | 0          | 8.4        | 0          | 0          | 67.35      |
| Gpd11LDKD_1           | 0          | 2.32       | 0          | 4.61       | 1.69       | 2.39       | 88.99      |
| Gpd11LDKD_2           | 0          | 0          | 0.93       | 4.41       | 1.16       | 0          | 93.5       |
| Gpd11LDKD_3           | 0          | 1.95       | 0          | 4.71       | 0.53       | 0.56       | 92.25      |
| HEK293_1              | 5.85       | 1.91       | 3.27       | 7.52       | 0          | 1.95       | 79.51      |
| HEK293_2              | 0          | 1.72       | 1.4        | 3.13       | 0          | 4.89       | 88.87      |
| HEK293_3              | 2.925      | 1.815      | 2.335      | 5.325      | 0          | 3.42       | 84.19      |
| Caki-1_1              | 35.38      | 0          | 0          | 6.48       | 0          | 1.58       | 56.56      |
| Caki-1_2              | 34         | 0          | 0.46       | 6.87       | 0          | 1.09       | 57.58      |
| Caki-1_3              | 32.12      | 0.35       | 0          | 8.2        | 0          | 2          | 57.33      |
| Renca_1               | 26.47      | 0.59       | 0.66       | 5.21       | 0.42       | 0.46       | 66.19      |
| Renca_2               | 28.74      | 0.39       | 0.21       | 2.14       | 0.26       | 0.32       | 67.94      |
| Renca_3               | 26.1       | 0.19       | 0          | 1.72       | 0.19       | 0.69       | 71.11      |
| Gpd2KD_1              | 24.64      | 0          | 0          | 5.04       | 0          | 0          | 70.32      |
| Gpd2KD_2              | 22.02      | 0          | 0.17       | 4.46       | 0.91       | 0.53       | 71.91      |
| Gpd2KD_3              | 18.97      | 0          | 0.65       | 4.58       | 0.76       | 0.59       | 74.46      |
